# Supplementary material
Source: Elsevier journal article supplement (https://www.sciencedirect.com/science/article/pii/S1138359320300630)
Supplement: mmc1 [file S1138359320300630:mmc1.pdf]

## Cuestionario 2: MBI

*Este cuestionario Maslach Burnout Inventory (MBI) está constituido por 22 ítems en forma de afirmaciones, sobre los sentimientos y actitudes del profesional en su y su función es medir el desgaste profesional. Este test pretende medir la frecuencia y la intensidad con la que se sufre el Burnout.*

**Escriba el número que crea oportuno sobre la frecuencia con que siente los enunciados:**

- 0= nunca
- 1= pocas veces al año o menos.
- 2= una vez al mes o menos.
- 3= unas pocas veces al mes.
- 4= una vez a la semana.
- 5= pocas veces a la semana.
- 6= todos los días.

|    |                                                                                               |  |
|----|-----------------------------------------------------------------------------------------------|--|
| 1  | Me siento emocionalmente agotado por mi trabajo                                               |  |
| 2  | Cuando termino mi jornada de trabajo me siento vacío                                          |  |
| 3  | Cuando me levanto por la mañana y me enfrento a otra jornada de trabajo me siento fatigado    |  |
| 4  | Siento que puedo entender fácilmente a los pacientes                                          |  |
| 5  | Siento que estoy tratando a algunos pacientes como si fueran objetos impersonales             |  |
| 6  | Siento que trabajar todo el día con la gente me cansa                                         |  |
| 7  | Siento que trato con mucha eficacia los problemas de mis pacientes                            |  |
| 8  | Siento que mi trabajo me está desgastando                                                     |  |
| 9  | Siento que estoy influyendo positivamente en la vida de otras personas a través de mi trabajo |  |
| 10 | Siento que me he hecho más duro con la gente                                                  |  |
| 11 | Me preocupa que este trabajo me esté endureciendo emocionalmente                              |  |
| 12 | Me siento con mucha energía en mi trabajo                                                     |  |
| 13 | Me siento frustrado en mi trabajo                                                             |  |
| 14 | Siento que estoy demasiado tiempo en mi trabajo                                               |  |

|    |                                                                                   |  |
|----|-----------------------------------------------------------------------------------|--|
|    |                                                                                   |  |
| 15 | Siento que realmente no me importa lo que les ocurra a mis pacientes              |  |
| 16 | Siento que trabajar en contacto directo con la gente me cansa                     |  |
| 17 | Siento que puedo crear con facilidad un clima agradable con mis pacientes         |  |
| 18 | Me siento estimado después de haber trabajado íntimamente con mis pacientes       |  |
| 19 | Creo que consigo muchas cosas valiosas en este trabajo                            |  |
| 20 | Me siento como si estuviera al límite de mis posibilidades                        |  |
| 21 | Siento que en mi trabajo los problemas emocionales son tratados de forma adecuada |  |
| 22 | Me parece que los pacientes me culpan de alguno de sus problemas                  |  |

### **EVALUACIÓN:**

El resultado de este cuestionario se obtiene en 3 variables numéricas con los siguientes puntos de corte: CE bajo,  $\leq 18$ , CE medio de 19-26 y CE alto,  $\geq 27$ ; DP bajo,  $\leq 5$ , DP media de 6-9 y DP alta,  $\geq 10$ , y RP, baja  $\leq 33$ , RP media de 34-39 y RP alta,  $\geq 40$ .

Las subescalas de CE y DP indican mayor desgaste a mayor puntuación. La RP funciona en sentido inverso, indicando mayor desgaste las puntuaciones bajas. Estas 3 dimensiones consideran el síndrome de estar quemado como una variable continua que se puede experimentar en diferentes niveles y aunque no hay puntuaciones de corte a nivel clínico para medir la existencia o no de Burnout, puntuaciones altas en AE y DP y baja en RP definen el síndrome. Consideramos como prevalencia de Burnout niveles altos en al menos una de las 3 dimensiones.
