# Supplementary material
Source: Elsevier journal article supplement (https://www.sciencedirect.com/science/article/pii/S1138359320300630)
Supplement: mmc2 [file S1138359320300630:mmc2.docx]

# TMMS-24

INSTRUCCIONES:

*A continuación encontrará algunas afirmaciones sobre sus emociones y sentimientos. Lea atentamente cada frase y indique por favor el grado de acuerdo o desacuerdo con respecto a las mismas. Señale con una “X” la respuesta que más se aproxime a sus preferencias.*

*No hay respuestas correctas o incorrectas, ni buenas o malas. No emplee mucho tiempo en cada respuesta.*

| **1** | **2** | **3** | **4** | **5** |
| --- | --- | --- | --- | --- |
| **Nada de Acuerdo** | **Algo de Acuerdo** | **Bastante de acuerdo** | **Muy de Acuerdo** | **Totalmente de acuerdo** |

| 1. | Presto mucha atención a los sentimientos. | 1 | 2 | 3 | 4 | 5 |
| --- | --- | --- | --- | --- | --- | --- |
| 2. | Normalmente me preocupo mucho por lo que siento. | 1 | 2 | 3 | 4 | 5 |
| 3. | Normalmente dedico tiempo a pensar en mis emociones. | 1 | 2 | 3 | 4 | 5 |
| 4. | Pienso que merece la pena prestar atención a mis emociones y estado de ánimo. | 1 | 2 | 3 | 4 | 5 |
| 5. | Dejo que mis sentimientos afecten a mis pensamientos. | 1 | 2 | 3 | 4 | 5 |
| 6. | Pienso en mi estado de ánimo constantemente. | 1 | 2 | 3 | 4 | 5 |
| 7. | A menudo pienso en mis sentimientos. | 1 | 2 | 3 | 4 | 5 |
| 8. | Presto mucha atención a cómo me siento. | 1 | 2 | 3 | 4 | 5 |
| 9. | Tengo claros mis sentimientos. | 1 | 2 | 3 | 4 | 5 |
| 10. | Frecuentemente puedo definir mis sentimientos. | 1 | 2 | 3 | 4 | 5 |
| 11. | Casi siempre sé cómo me siento. | 1 | 2 | 3 | 4 | 5 |
| 12. | Normalmente conozco mis sentimientos sobre las personas. | 1 | 2 | 3 | 4 | 5 |
| 13. | A menudo me doy cuenta de mis sentimientos en diferentes situaciones. | 1 | 2 | 3 | 4 | 5 |
| 14. | Siempre puedo decir cómo me siento. | 1 | 2 | 3 | 4 | 5 |
| 15. | A veces puedo decir cuáles son mis emociones. | 1 | 2 | 3 | 4 | 5 |
| 16. | Puedo llegar a comprender mis sentimientos. | 1 | 2 | 3 | 4 | 5 |
| 17. | Aunque a veces me siento triste, suelo tener una visión optimista. | 1 | 2 | 3 | 4 | 5 |
| 18. | Aunque me sienta mal, procuro pensar en cosas agradables. | 1 | 2 | 3 | 4 | 5 |
| 19. | Cuando estoy triste, pienso en todos los placeres de la vida. | 1 | 2 | 3 | 4 | 5 |
| 20. | Intento tener pensamientos positivos aunque me sienta mal. | 1 | 2 | 3 | 4 | 5 |
| 21. | Si doy demasiadas vueltas a las cosas, complicándolas, trato de calmarme. | 1 | 2 | 3 | 4 | 5 |
| 22. | Me preocupo por tener un buen estado de ánimo. | 1 | 2 | 3 | 4 | 5 |
| 23. | Tengo mucha energía cuando me siento feliz. | 1 | 2 | 3 | 4 | 5 |
| 24. | Cuando estoy enfadado intento cambiar mi estado de ánimo. | 1 | 2 | 3 | 4 | 5 |

La TMMS-24 está basada en *Trait Meta-Mood Scale* (TMMS) del grupo de investigación de Salovey y Mayer. La escala original es una escala rasgo que evalúa el metaconocimiento de los estados emocionales mediante 48 ítems. En concreto, las destrezas con las que podemos ser conscientes de nuestras propias emociones así como de nuestra capacidad para regularlas.

La TMMS-24 contiene tres dimensiones claves de la IE con 8 ítems cada una de ellas: Atención emocional, Claridad emocional y Reparación emocional. En la Tabla 1 se muestran los tres componentes.

*Tabla 1. Componentes de la IE en el test*

| Definición | |
| --- | --- |
| **Atención** | Soy capaz de *atender* a los sentimientos de forma adecuada |
| **Claridad** | *Comprendo* bien mis estados emocionales |
| **Reparación** | Soy capaz de *regular* los estados emocionales de forma adecuada |

# Evaluación

Para corregir y obtener una puntuación en cada uno de los factores, sume los ítems del 1 al 8 para el factor *Atención*, los ítems del 9 al 16 para el factor *Claridad* y del 17 al 24 para el factor *Reparación*. Luego mire su puntuación en cada una de las tablas que se presentan. Se muestran los puntos de corte para hombres y mujeres, pues existen diferencias en las puntuaciones para cada uno de ellos.

Recuerde que la veracidad y la confianza de los resultados obtenidos dependen de lo sincero que haya sido al responder a las preguntas.

|  | **Puntuaciones** | **Puntuaciones** |
| --- | --- | --- |
|  | *Hombres* | *Mujeres* |
| **Atención** | Debe mejorar su atención: presta poca atención  < 21 | Debe mejorar su atención: presta poca atención  < 24 |
| Adecuada atención 22 a 32 | Adecuada atención 25 a 35 |
| Debe mejorar su atención: presta demasiada atención  > 33 | Debe mejorar su atención: presta demasiada atención  > 36 |

|  | **Puntuaciones** | **Puntuaciones** |
| --- | --- | --- |
|  | *Hombres* | *Mujeres* |
| **Claridad** | Debe mejorar su comprensión  < 25 | Debe mejorar su comprensión  < 23 |
| Adecuada comprensión 26 a 35 | Adecuada comprensión 24 a 34 |
| Excelente comprensión  > 36 | Excelente comprensión  > 35 |

|  | **Puntuaciones** | **Puntuaciones** |
| --- | --- | --- |
|  | *Hombres* | *Mujeres* |
| **Reparación** | Debe mejorar su regulación  < 23 | Debe mejorar su regulación  < 23 |
| Adecuada regulación 24 a 35 | Adecuada regulación 24 a 34 |
| Excelente regulación  > 36 | Excelente regulación  > 35 |

# Algunas referencias sobre la utilización de la escala

Carranque, G.A., Fernández-Berrocal, P., Baena, E., Bazán, R., Cárdenas, B., Herraiz, R., y Velasco, B. (2004). Dolor postoperatorio e inteligencia emocional. *Revista Española de Anestesiología y Reanimación, 51*, 75-79.

Durán, A., Extremera, N., Rey, L., Fernández-Berrocal, P., y Montalbán, F. M. (2006). Predicting academic burnout and engagement in educational settings: Assessing the incremental validity of perceived emotional intelligence beyond perceived stress and general self-efficacy. *Psicothema, 18,* 158-164*.*

Extremera, N. y Fernández-Berrocal, P. (2002). Relation of perceived emotional intelligence and health- related quality of life in middle-aged women. *Psychological Reports, 91,* 47-59.

Extremera, N. y Fernández-Berrocal, P. (2003). La inteligencia emocional: Métodos de evaluación en el aula*. Revista Iberoamericana de Educación, 30,* 1-12.

Extremera, N. y Fernández-Berrocal, P. (2004). Inteligencia emocional, calidad de las relaciones interpersonales y empatía en estudiantes universitarios. *Clínica y Salud, 15*, 117-137.

Extremera, N. y Fernández-Berrocal, P. (2005). Inteligencia emocional y diferencias individuales en el meta-conocimiento de los estados emocionales: una revisión de los estudios con el Trait Meta- Mood Scale. *Ansiedad y Estrés*, *11*, 101-122.

Extremera, N. y Fernández-Berrocal, P. (2005). Perceived emotional intelligence and life satisfaction: Predictive and Incremental validity using the Trait Meta-mood Scale. *Personality and Individual Differences, 39*, 937-948.

Extremera, N. y Fernández-Berrocal, P., (2004). El uso de las medidas de habilidad en el ámbito de la inteligencia emocional: Ventajas e inconvenientes con respecto a las medidas de auto-informe. *Boletín de Psicología, 80*, 59-77.

Extremera, N., Fernández-Berrocal, P., Mestre, J. M., y Guil, R. (2004). Medidas de evaluación de la inteligencia emocional. *Revista Latinoamericana de Psicología, 36,* 209-228.

Extremera, N., y Fernández-Berrocal, P. (2006). Emotional Intelligence as Predictor of Mental, Social, and Physical Health in University Students. *The Spanish Journal of Psychology, 9*, 45-51.

Fernández-Berrocal, P. y Ramos, N (2002). Evaluando la inteligencia emocional. Fernández-Berrocal P y Ramos, N ( Eds .), *Corazones inteligentes.* Editorial Kairós: Barcelona.

Fernández-Berrocal, P., Alcaide, R., Domínguez, E., Fernández-McNally, C., Ramos, N. S., y Ravira, M. (1998). Adaptación al castellano de la escala rasgo de metaconocimiento sobre estados emocionales de Salovey et al.: datos preliminares. *Libro de Actas del V Congreso de Evaluación Psicológica.* Málaga.

Fernández-Berrocal, P., Alcaide, R., Extremera, N., y Pizarro, D. (2006). The role of emotional intelligence in anxiety and depression among adolescents. *Individual Differences Research, 4,* 16-27*.*

Fernández-Berrocal, P., Extremera, N. y Ramos, N. (2004). Validity and reliability of the Spanish modified version of the Trait Meta-Mood Scale. *Psychological Reports, 94*, 751-755.

Fernández-Berrocal, P., Salovey, P., Vera, A., Extremera, N. y Ramos, N. (2005). Cultural influences on the relation between perceived emotional intelligence and depression. *International Review of Social Psychology, 18*, 91-107.

Fernández-Berrocal, P., y Extremera, N. (2005). About emotional intelligence and moral decisions.

*Behavioral and Brain Sciences, 28,* 548-549*.*

Fernández-Berrocal, P., y Extremera, N. (2006). Emotional intelligence and emotional reactivity and recovery in laboratory context. *Psicothema, 18,* 72-78.

Fernández-Berrocal, P., & Extremera, N. (2008). A review of trait meta-mood research. *International Journal of Psychology Research, 2(1)*, 39-67.

Queirós, M. M., Fernández-Berrocal, P., Extremera, N. Carral, J. M. C. y Queirós, P. S. (2005). Validação e fiabilidade da versão portuguesa modificada da Trait Meta-Mood Scale. *Revista de Psicologia, Educaão e Cultura, 9*, 199-216.

Ramos-Díaz, N., Fernández-Berrocal, P., & Extremera, N. (2007). Perceived Emotional intelligence facilitates Cognitive-Emotional Processes of Adaptation to an Acute Stressor. *Cognition & Emotion, 20*, 1-15.

Salovey, P., Mayer, J. D., Goldman, S. L., Turvey, C., & Palfai, T. P. (1995). Emotional attention, clarity, and repair: exploring emotional intelligence using the Trait Meta-Mood Scale. En J. W. Pennebaker (Ed*.*)*, Emotion, Disclosure, & Health* (pp. 125-151). Washington: American Psychological Association.

Williams, F.M., Fernández-Berrocal, P., Extremera, N., Ramos, N. y Joiner, T. E. (2004). Mood regulation skill and the symptoms of endogenous and hopelessness depression. *Journal of Psychopathology and Behavioral Assessment, 26*, 233-240.

**Para más información consultar la p. web:** <http://www.researchgate.net/profile/Pablo_Fernandez-Berrocal> [http://emotional.intelligence.uma.es](http://emotional.intelligence.uma.es/)
